# Supplementary material for: Implementation of an interconnected fault system in probabilistic seismic hazard assessment (PSHA): the Levant fault system
Source: Copernicus journal article supplement (doi:10.5194/nhess-25-3397-2025), 2025-09-15
Supplement: Supplementary file 1 [file Electronic Supplement.pdf › supplement/Electronic Supplement.pdf]

## Supplement

The following file includes three columns: longitude, latitude and slip rate of the sections constituting the Levant Fault System (in the same order as in Table 1 in the manuscript)

Coordinates\_sections\_Levant\_Fault\_System.txt
