# Supplementary material for: Implementation of an interconnected fault system in probabilistic seismic hazard assessment (PSHA): the Levant fault system
Source: Copernicus journal article supplement (doi:10.5194/nhess-25-3397-2025), 2025-09-15
Supplement: Supplementary file [file nhess-25-3397-2025-supplement-title-page.pdf › nhess-25-3397-2025-supplement-title-page.pdf]

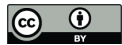

*Supplement of*

**Implementation of an interconnected fault system in probabilistic seismic hazard assessment (PSHA): the Levant fault system**

**Sarah El Kadri et al.**

*Correspondence to:* Sarah El Kadri (sarahelkadry7@gmail.com)

- nhess-25-3397-2025-supplement-title-page.pdf
- supplement
  - Coordinates\_sections\_Levant\_Fault\_System\_ElKadri\_etal.txt
  - Electronic Supplement.pdf

The copyright of individual parts of the supplement might differ from the article licence.
